# Supplementary material for: Antiferromagnetic ordering in the TM-adsorbed AlN monolayer (TM = V and Cr)
Source: Royal Society of Chemistry journal article supplement (doi:10.1039/d2ra00849a), 2022-01-01
Supplement: d2ra00849a1.pdf [file d2ra00849a1.pdf]

## Antiferromagnetic ordering in the TM-adsorbed AlN monolayer (TM = V and Cr)

Duy Khanh Nguyen<sup>a</sup>, Tuan V. Vu<sup>b,c</sup>, and D. M. Hoat<sup>d,e,\*</sup>

<sup>a</sup>High-Performance Computing Lab (HPC Lab), Information Technology Center, Thu Dau Mot University, Binh Duong Province, Vietnam

<sup>b</sup>Division of Computational Physics, Institute for Computational Science, Ton Duc Thang University, Ho Chi Minh City, Viet Nam

<sup>c</sup>Faculty of Electrical & Electronics Engineering, Ton Duc Thang University, Ho Chi Minh City, Viet Nam

<sup>d</sup>Institute of Theoretical and Applied Research, Duy Tan University, Ha Noi 100000, Viet Nam

<sup>e</sup>Faculty of Natural Sciences, Duy Tan University, Da Nang 550000, Viet Nam

\*Corresponding author: [dominhhoat@duytan.edu.vn](mailto:dominhhoat@duytan.edu.vn)

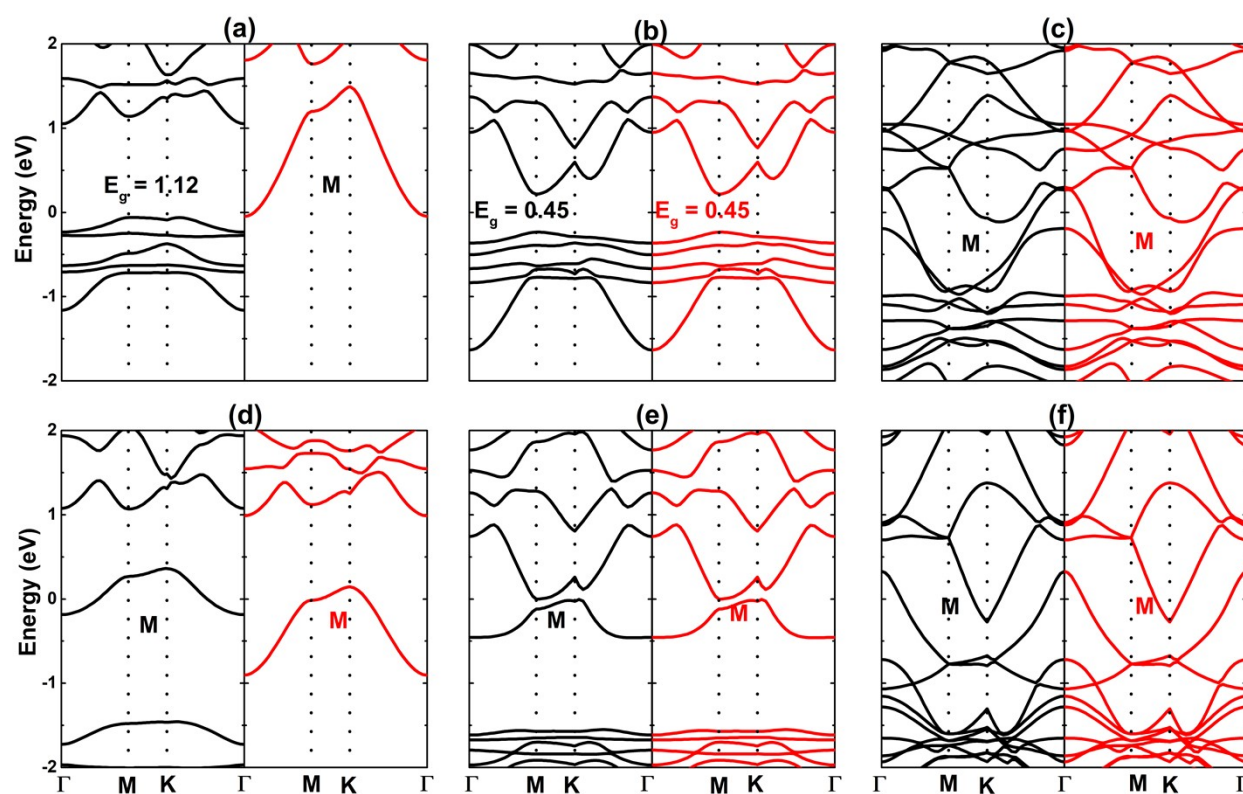

Figure S1: Spin-resolved band structure (Black line: spin-up; Red line: spin-down;  $E_g$ : electronic band gap; M: metallic nature) of the V- and Cr-adsorbed AlN monolayer calculated by DFT-D3 with coverage of (a)-(d) 0.25 ML; (b)-(e) 0.5 ML; and (c)-(f) 1.0 ML.

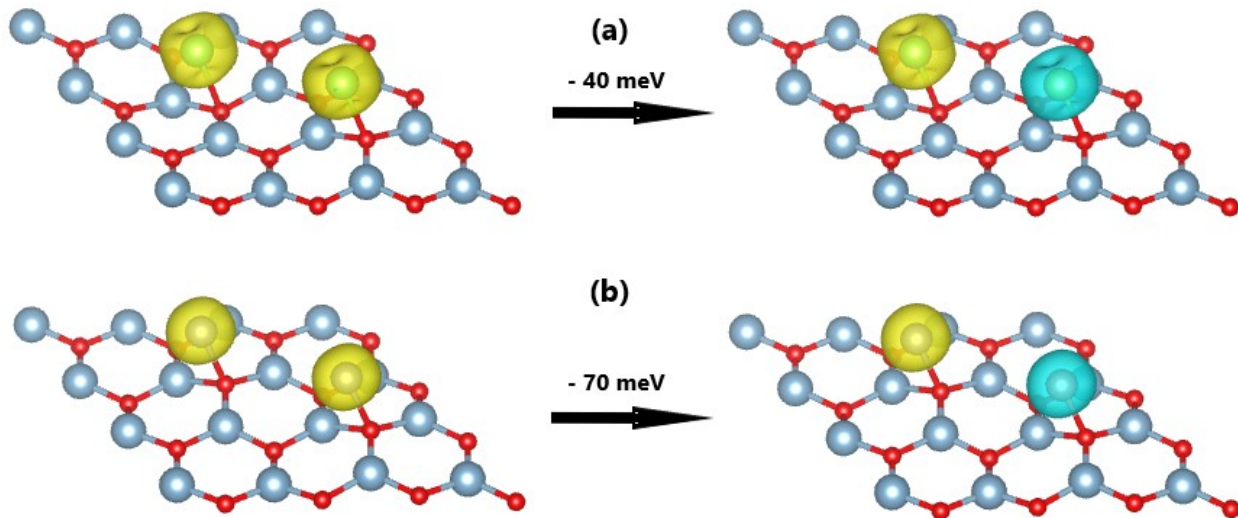

Fig.S2: Energy of magnetic transition of (a) V- and (b) Cr-adsorbed AlN monolayer in a  $4\times 4\times 1$  supercell.

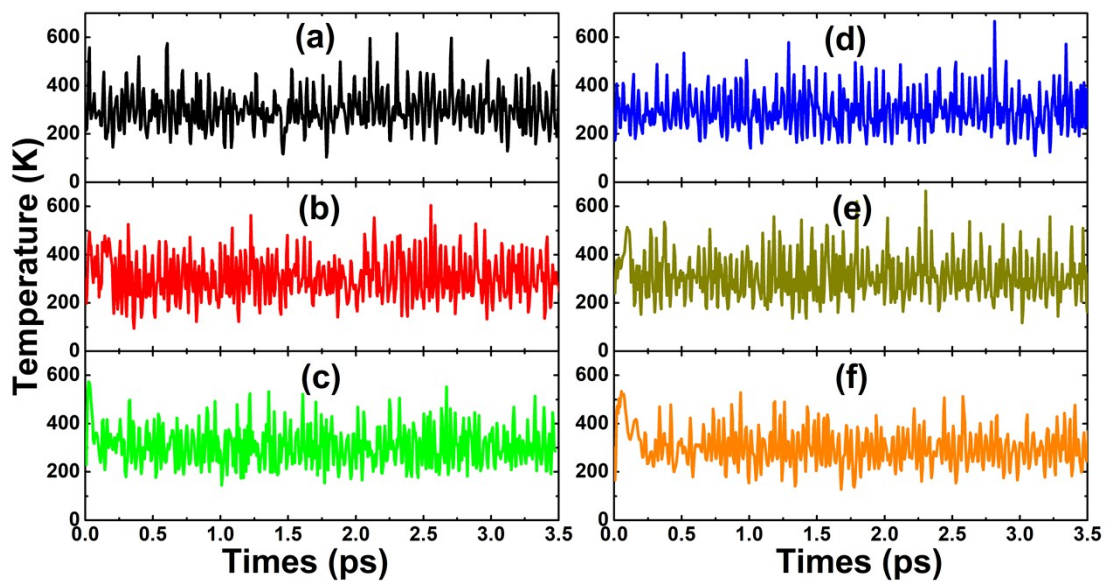

Fig.S3: Fluctuation of temperature as a function of molecular dynamics simulation steps at 300 K of V- and Cr-adsorbed AlN monolayer with coverage of (a-d) 0.25 ML, (b-e) 0.50 ML, and (c-f) 1.0 ML.
